# Supplementary material for: The interface between chloroaluminum phthalocyanine and titanium dioxide: the influence of surface defects and substrate termination
Source: Royal Society of Chemistry journal article supplement (doi:10.1039/d1cp01638e), 2021-01-01
Supplement: d1cp01638e1.pdf [file d1cp01638e1.pdf]

## SUPPORTING INFORMATION

### **The interface between chloroaluminum phthalocyanine and titanium dioxide: The influence of surface defects and substrate termination**

Małgorzata Polek,<sup>†</sup> Tamara V. Basova,<sup>||,⊥</sup> Thomas Chassé,<sup>†,‡</sup> Heiko Peisert<sup>†\*</sup>

<sup>†</sup>Institute of Physical and Theoretical Chemistry, University of Tübingen, Auf der Morgenstelle 18, 72076 Tübingen, Germany

<sup>‡</sup>Center for Light-Matter Interaction, Sensors & Analytics (LISA<sup>+</sup>) at the University of Tübingen, Auf der Morgenstelle 18, 72076 Tübingen, Germany

<sup>||</sup>Nikolaev Institute of Inorganic Chemistry SB RAS, 3 Lavrentiev Ave., 630090 Novosibirsk, Russia

<sup>⊥</sup>Novosibirsk State University, Pirogova Str. 2, 630090 Novosibirsk, Russia

\* Corresponding author, [heiko.peisert@uni-tuebingen.de](mailto:heiko.peisert@uni-tuebingen.de), Tel.: (+49) 07071 / 29-76931, Fax: (+49) 07071 / 29-5490

**Table S1.** Fitting parameters: Ti 2p peak of TiO<sub>2</sub>(100) prepared with oxygen treatment in the last annealing step.

|               |       | AlClPc/TiO <sub>2</sub> (100): O <sub>2</sub> treatment |       |       |        |       |       |
|---------------|-------|---------------------------------------------------------|-------|-------|--------|-------|-------|
|               |       | Film thickness [nm]                                     |       |       |        |       |       |
|               |       | 0 nm                                                    |       |       | 1.2 nm |       |       |
| Doublet name  |       | Ti 4+                                                   | Sat1  | Sat2  | Ti 4+  | Sat1  | Sat2  |
| Position/eV   | P1    | 459.5                                                   | 462.5 | 472.8 | 459.5  | 462.5 | 472.9 |
|               | P2    | 465.2                                                   | 468.2 | 478.5 | 465.2  | 468.2 | 478.6 |
| GP-FWHM/eV    | P1    | 0.8                                                     | 1.7   | 2.5   | 0.8    | 1.6   | 2.3   |
|               | P2    | 1.5                                                     | 1.7   | 2.5   | 1.5    | 1.6   | 2.3   |
| LP-FWHM/eV    | P1    | 0.5                                                     | 0.5   | 0.5   | 0.5    | 0.5   | 0.5   |
|               | P2    | 0.6                                                     | 0.5   | 0.6   | 0.6    | 0.5   | 0.6   |
| Relative Area | P1+P2 | 0.86                                                    | 0.02  | 0.12  | 0.86   | 0.02  | 0.12  |

In the fitting model for the Ti 2p peak of rutile TiO<sub>2</sub>(100) surfaces treated with oxygen, the same parameters can be used for both clean substrate and the substrate with AlClPc film. Since the substrate is not reduced, Ti<sup>3+</sup> contribution is not fitted in the reference spectrum. It does not appear as well in the Ti 2p peak of TiO<sub>2</sub>(100) covered with 1.2 nm AlClPc film. The relative area of fitted peaks does not change upon AlClPc adsorption.

**Table S2.** Fitting parameters: Ti 2p peak of TiO<sub>2</sub>(100) prepared without oxygen treatment in the last annealing step.

|               |     | AlClPc/TiO <sub>2</sub> (100): Absence of O <sub>2</sub> |       |       |       |        |       |       |       |
|---------------|-----|----------------------------------------------------------|-------|-------|-------|--------|-------|-------|-------|
|               |     | Film thickness [nm]                                      |       |       |       |        |       |       |       |
|               |     | 0 nm                                                     |       |       |       | 1.3 nm |       |       |       |
| Doublet name  |     | Ti 4+                                                    | Ti 3+ | Sat1  | Sat2  | Ti 4+  | Ti 3+ | Sat1  | Sat2  |
| Position/eV   | P1  | 459.3                                                    | 457.4 | 462.3 | 472.6 | 459.4  | 457.5 | 462.4 | 472.7 |
|               | P2  | 465.0                                                    | 463.1 | 468.0 | 478.3 | 465.1  | 463.2 | 468.1 | 478.4 |
| GP-FWHM/eV    | P1  | 1.0                                                      | 1.1   | 2.1   | 3.1   | 1.0    | 1.1   | 2.0   | 2.7   |
|               | P2  | 1.9                                                      | 1.4   | 2.1   | 3.1   | 1.8    | 1.3   | 2.0   | 2.7   |
| LP-FWHM/eV    | P1  | 0.5                                                      | 0.5   | 0.5   | 0.5   | 0.5    | 0.5   | 0.5   | 0.5   |
|               | P2  | 0.6                                                      | 0.5   | 0.5   | 0.5   | 0.6    | 0.5   | 0.5   | 0.5   |
| Relative Area | P1+ | 0.74                                                     | 0.14  | 0.02  | 0.11  | 0.78   | 0.10  | 0.02  | 0.10  |

  

|                                                         |      |      |
|---------------------------------------------------------|------|------|
| Ti <sup>3+</sup> /(Ti <sup>3+</sup> +Ti <sup>4+</sup> ) | 0.16 | 0.11 |
|---------------------------------------------------------|------|------|

The Ti 2p peak of the defect rich TiO<sub>2</sub>(100) surface can be fitted with similar parameters as the oxygen treated surface. However, the Gaussian width of the fitted peaks increased with the introduction of defects through sputtering as shown in literature<sup>1</sup> on anatase TiO<sub>2</sub>(101).

Since defects are present in a clean substrate on a reduced rutile TiO<sub>2</sub>(100) surface, a Ti<sup>3+</sup> contribution is included in the fitting model. The relative intensity of the Ti<sup>3+</sup> contribution (relative to the Ti<sup>4+</sup> peak area) decreases as the AlClPc film thickness increases.

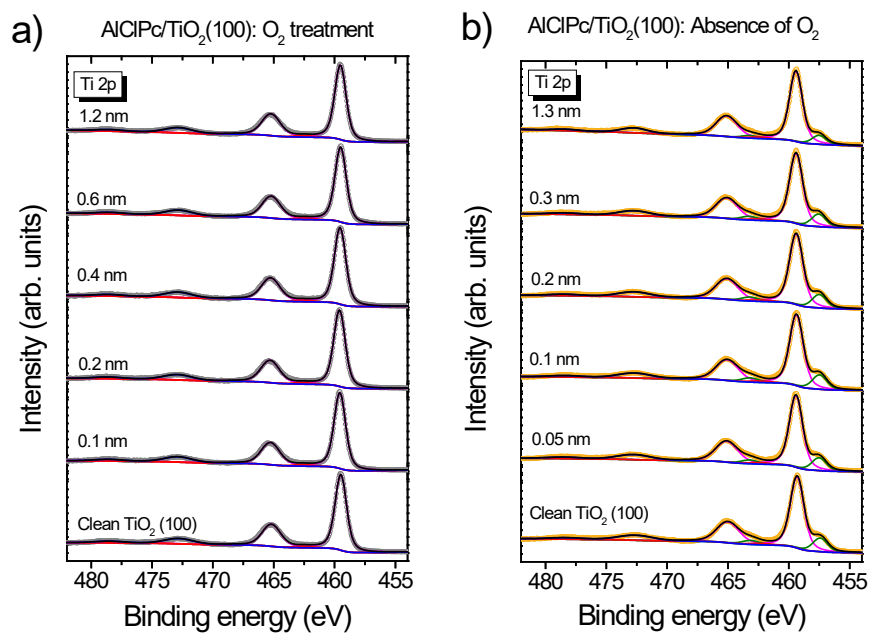

**Figure S1.** Ti 2p spectra of (a) AIClPc/TiO<sub>2</sub>(100) treated with O<sub>2</sub> and (b) AIClPc/TiO<sub>2</sub>(100) prepared in absence of O<sub>2</sub>.

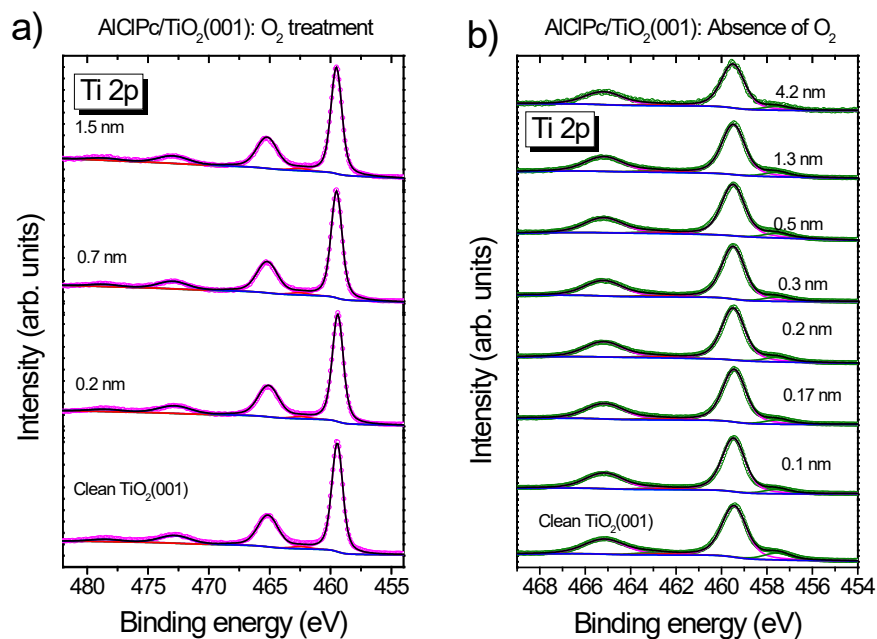

**Figure S2.** Ti 2p spectra of (a) AIClPc/TiO<sub>2</sub>(001) treated with O<sub>2</sub> and (b) AIClPc/TiO<sub>2</sub>(001) prepared in absence of O<sub>2</sub>.

**Table S3.** Fitting parameters: O1s peak of TiO<sub>2</sub>(100) prepared with and without oxygen treatment during annealing.

|               | AlClPc/TiO <sub>2</sub> (100): O <sub>2</sub> treatment |       | AlClPc/TiO <sub>2</sub> (100): Absence of O <sub>2</sub> |       |
|---------------|---------------------------------------------------------|-------|----------------------------------------------------------|-------|
|               | Clean Substrate                                         |       |                                                          |       |
| Doublet name  | O-1                                                     | O-2   | O-1                                                      | O-2   |
| Position/eV   | 530.8                                                   | 531.9 | 530.6                                                    | 531.7 |
| GP-FWHM/eV    | 1.0                                                     | 1.1   | 1.0                                                      | 1.1   |
| LP-FWHM/eV    | 0.1                                                     | 0.1   | 0.1                                                      | 0.1   |
| Relative Area | 0.97                                                    | 0.03  | 0.91                                                     | 0.09  |

**Table S4.** Fitting parameters: O1s peak of TiO<sub>2</sub>(001) prepared with (0% Ti<sup>3+</sup>) and without (12% Ti<sup>3+</sup>) oxygen treatment in during annealing.

|               | AlClPc/TiO <sub>2</sub> (001): O <sub>2</sub> treatment |       | AlClPc/TiO <sub>2</sub> (001): Absence of O <sub>2</sub> |       |
|---------------|---------------------------------------------------------|-------|----------------------------------------------------------|-------|
|               | Clean Substrate                                         |       |                                                          |       |
| Doublet name  | O-1                                                     | O-2   | O-1                                                      | O-2   |
| Position/eV   | 530.8                                                   | 531.9 | 530.6                                                    | 531.7 |
| GP-FWHM/eV    | 1.0                                                     | 1.1   | 1.0                                                      | 1.1   |
| LP-FWHM/eV    | 0.1                                                     | 0.1   | 0.1                                                      | 0.1   |
| Relative Area | 0.97                                                    | 0.03  | 0.92                                                     | 0.08  |

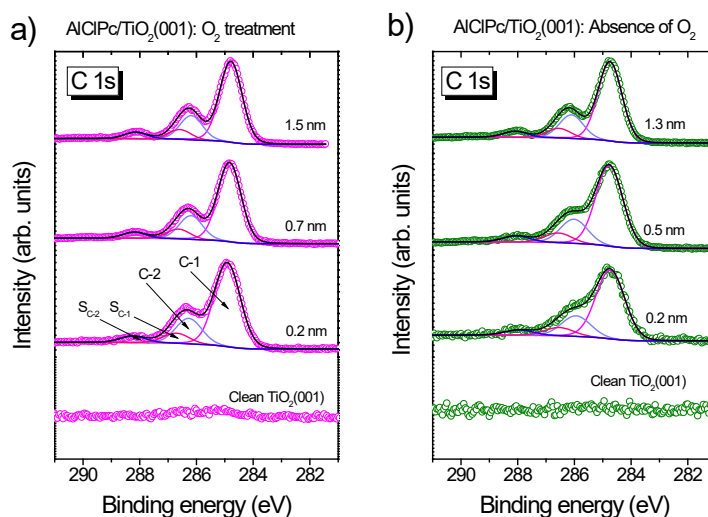

**Figure S3.** Thickness dependent C1s core level spectra of AlClPc evaporated on differently prepared TiO<sub>2</sub>(001) (a) AlClPc on TiO<sub>2</sub>(001) prepared in presence of oxygen, (b) AlClPc on TiO<sub>2</sub>(001) prepared in absence of oxygen. All spectra can be described by the same peak shape.

The C1s spectra of AlClPc on TiO<sub>2</sub>(001) both oxygen treated and reduced are shown in **Figure 6a and 6b**. A trend similar to the spectra of AlClPc on TiO<sub>2</sub>(100) is seen. The carbon C1s spectra can be fitted with a set of 4 peaks. If the substrate was treated with oxygen, the (C–1) to (C–2) distance is constant at 1.4 eV and independent of film thickness. The difference in Gauss width is even smaller and lies between 1.0 eV and 0.9 eV for 0.2 nm and 1.5 nm film thickness respectively. With the small variation in peak width there is little change in the peak form upon organic film evaporation.

When the (001) surface is reduced (12% Ti 3+), the Gauss width spans between 1.2 and 0.9 eV. The distance between the (C–1) and (C–2) carbons varies between 1.2 eV and 1.4 eV for 0.2 nm and thick film. The peak shape is broadened for the sub-ML films, due to the inhomogeneous adsorption sites as in the case of reduced TiO<sub>2</sub>(100) surface, a clear response to the defects present at the surface. The related peak fit tables can be found in Supporting Information (**Table S6**).

**Table S5.** C1s core level spectra fitting parameters of AlClPc films on TiO<sub>2</sub>(100) surface.

| AlClPc/TiO <sub>2</sub> (100): O <sub>2</sub> treatment |                             |       |                    |                    |                             |       |                    |                    |                             |       |                    |                    |
|---------------------------------------------------------|-----------------------------|-------|--------------------|--------------------|-----------------------------|-------|--------------------|--------------------|-----------------------------|-------|--------------------|--------------------|
|                                                         | Layer thickness 0.1 nm      |       |                    |                    | Layer thickness 0.4 nm      |       |                    |                    | Layer thickness 1.2 nm      |       |                    |                    |
| Peak name                                               | C - 1                       | C - 2 | S <sub>(C-1)</sub> | S <sub>(C-2)</sub> | C - 1                       | C - 2 | S <sub>(C-1)</sub> | S <sub>(C-2)</sub> | C - 1                       | C - 2 | S <sub>(C-1)</sub> | S <sub>(C-2)</sub> |
| GP-FWHM/eV                                              | 1.0                         | 1.0   | 1.0                | 1.0                | 1.0                         | 1.0   | 1.0                | 1.0                | 1.0                         | 1.0   | 1.0                | 1.0                |
| Position/eV                                             | 284.8                       | 286.1 | 286.6              | 288.1              | 284.8                       | 286.1 | 286.6              | 288.1              | 284.8                       | 286.1 | 286.6              | 288.1              |
| LP-FWHM/eV                                              | 0.1                         | 0.1   | 0.1                | 0.1                | 0.1                         | 0.1   | 0.1                | 0.1                | 0.1                         | 0.1   | 0.1                | 0.1                |
| rel. Area                                               | 0.67                        | 0.20  | 0,08               | 0.05               | 0.67                        | 0.20  | 0,08               | 0.05               | 0.67                        | 0.20  | 0,08               | 0.05               |
|                                                         | $(C2+S_{C-2})/(C1+S_{C-1})$ |       |                    | 0.33               | $(C2+S_{C-2})/(C1+S_{C-1})$ |       |                    | 0.34               | $(C2+S_{C-2})/(C1+S_{C-1})$ |       |                    | 0.34               |

| AlClPc/TiO <sub>2</sub> (100): Absence of O <sub>2</sub> |                             |       |                    |                    |                             |       |                    |                    |                             |       |                    |                    |
|----------------------------------------------------------|-----------------------------|-------|--------------------|--------------------|-----------------------------|-------|--------------------|--------------------|-----------------------------|-------|--------------------|--------------------|
|                                                          | Layer thickness 0.1 nm      |       |                    |                    | Layer thickness 0.3 nm      |       |                    |                    | Layer thickness 1.3 nm      |       |                    |                    |
| Peak name                                                | C - 1                       | C - 2 | S <sub>(C-1)</sub> | S <sub>(C-2)</sub> | C - 1                       | C - 2 | S <sub>(C-1)</sub> | S <sub>(C-2)</sub> | C - 1                       | C - 2 | S <sub>(C-1)</sub> | S <sub>(C-2)</sub> |
| GP-FWHM/eV                                               | 1.1                         | 1.1   | 1.1                | 1.1                | 1.0                         | 1.0   | 1.0                | 1.0                | 0.9                         | 0.9   | 0.9                | 0.9                |
| Position/eV                                              | 284.6                       | 285.8 | 286.4              | 287.8              | 284.6                       | 285.9 | 286.4              | 287.9              | 284.6                       | 286.0 | 286.4              | 288.0              |
| LP-FWHM/eV                                               | 0.1                         | 0.1   | 0.1                | 0.1                | 0.1                         | 0.1   | 0.1                | 0.1                | 0.1                         | 0.1   | 0.1                | 0.1                |
| rel. Area                                                | 0.67                        | 0.20  | 0,08               | 0.05               | 0.67                        | 0.20  | 0,08               | 0.05               | 0.67                        | 0.20  | 0,08               | 0.05               |
|                                                          | $(C2+S_{C-2})/(C1+S_{C-1})$ |       |                    | 0.34               | $(C2+S_{C-2})/(C1+S_{C-1})$ |       |                    | 0.34               | $(C2+S_{C-2})/(C1+S_{C-1})$ |       |                    | 0.34               |

**Table S6.** C1s core level spectra fitting parameters of AICIPc films on TiO<sub>2</sub>(001) surface.

| AICIPc/TiO <sub>2</sub> (001): O <sub>2</sub> treatment |                             |       |                    |                    |                             |       |                    |                    |                             |       |                    |                    |
|---------------------------------------------------------|-----------------------------|-------|--------------------|--------------------|-----------------------------|-------|--------------------|--------------------|-----------------------------|-------|--------------------|--------------------|
|                                                         | Layer thickness 0.2 nm      |       |                    |                    | Layer thickness 0.7 nm      |       |                    |                    | Layer thickness 1.5 nm      |       |                    |                    |
| Peak name                                               | C - 1                       | C - 2 | S <sub>(C-1)</sub> | S <sub>(C-2)</sub> | C - 1                       | C - 2 | S <sub>(C-1)</sub> | S <sub>(C-2)</sub> | C - 1                       | C - 2 | S <sub>(C-1)</sub> | S <sub>(C-2)</sub> |
| GP-FWHM/eV                                              | 1.0                         | 1.0   | 1.0                | 1.0                | 0.9                         | 0.9   | 0.9                | 0.9                | 0.9                         | 0.9   | 0.9                | 0.9                |
| Position/eV                                             | 284.9                       | 286.3 | 286.7              | 288.2              | 284.8                       | 286.2 | 286.6              | 288.2              | 284.8                       | 286.2 | 286.6              | 288.1              |
| LP-FWHM/eV                                              | 0.1                         | 0.1   | 0.1                | 0.1                | 0.1                         | 0.1   | 0.1                | 0.1                | 0.1                         | 0.1   | 0.1                | 0.1                |
| rel. Area                                               | 0.67                        | 0.20  | 0,08               | 0.05               | 0.67                        | 0.20  | 0,08               | 0.05               | 0.67                        | 0.20  | 0,08               | 0.05               |
|                                                         | $(C2+S_{C-2})/(C1+S_{C-1})$ |       |                    |                    | $(C2+S_{C-2})/(C1+S_{C-1})$ |       |                    |                    | $(C2+S_{C-2})/(C1+S_{C-1})$ |       |                    |                    |
|                                                         | 0.34                        |       |                    |                    | 0.33                        |       |                    |                    | 0.34                        |       |                    |                    |

| AICIPc/TiO <sub>2</sub> (001): Absence of O <sub>2</sub> |                             |       |                    |                    |                             |       |                    |                    |                             |       |                    |                    |
|----------------------------------------------------------|-----------------------------|-------|--------------------|--------------------|-----------------------------|-------|--------------------|--------------------|-----------------------------|-------|--------------------|--------------------|
|                                                          | Layer thickness 0.2 nm      |       |                    |                    | Layer thickness 0.5 nm      |       |                    |                    | Layer thickness 1.3 nm      |       |                    |                    |
| Peak name                                                | C - 1                       | C - 2 | S <sub>(C-1)</sub> | S <sub>(C-2)</sub> | C - 1                       | C - 2 | S <sub>(C-1)</sub> | S <sub>(C-2)</sub> | C - 1                       | C - 2 | S <sub>(C-1)</sub> | S <sub>(C-2)</sub> |
| GP-FWHM/eV                                               | 1.2                         | 1.2   | 1.2                | 1.2                | 1.1                         | 1.1   | 1.1                | 1.1                | 0.9                         | 0.9   | 0.9                | 0.9                |
| Position/eV                                              | 284.8                       | 286.0 | 286.6              | 288.0              | 284.8                       | 286.1 | 286.6              | 288.1              | 284.7                       | 286.1 | 286.5              | 288.1              |
| LP-FWHM/eV                                               | 0.1                         | 0.1   | 0.1                | 0.1                | 0.1                         | 0.1   | 0.1                | 0.1                | 0.1                         | 0.1   | 0.1                | 0.1                |
| rel. Area                                                | 0.67                        | 0.20  | 0,08               | 0.05               | 0.67                        | 0.20  | 0,08               | 0.05               | 0.67                        | 0.20  | 0,08               | 0.05               |
|                                                          | $(C2+S_{C-2})/(C1+S_{C-1})$ |       |                    |                    | $(C2+S_{C-2})/(C1+S_{C-1})$ |       |                    |                    | $(C2+S_{C-2})/(C1+S_{C-1})$ |       |                    |                    |
|                                                          | 0.34                        |       |                    |                    | 0.34                        |       |                    |                    | 0.33                        |       |                    |                    |

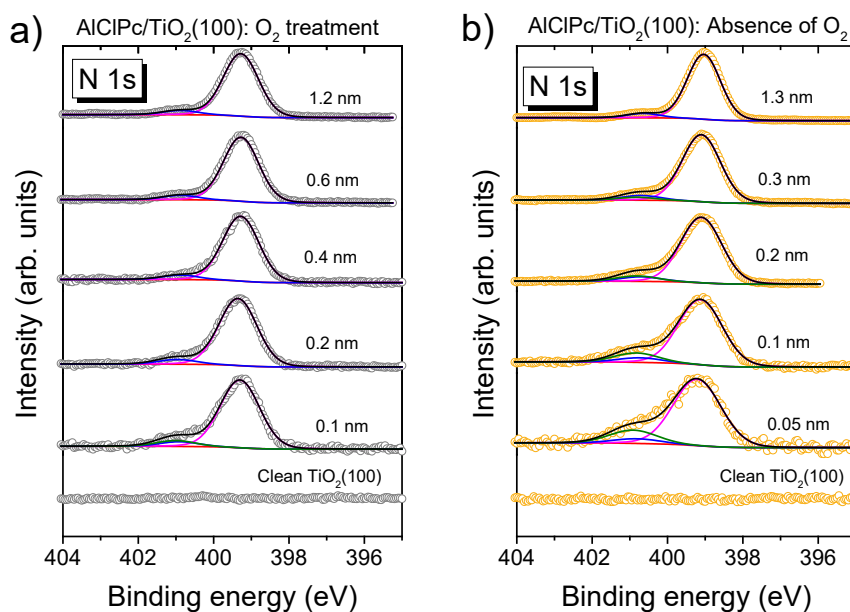

**Figure S4.** All N1s spectra fitted for (a) AICIPc/TiO<sub>2</sub>(100) treated with O<sub>2</sub>, (b) AICIPc/TiO<sub>2</sub>(100) prepared in absence of O<sub>2</sub>.

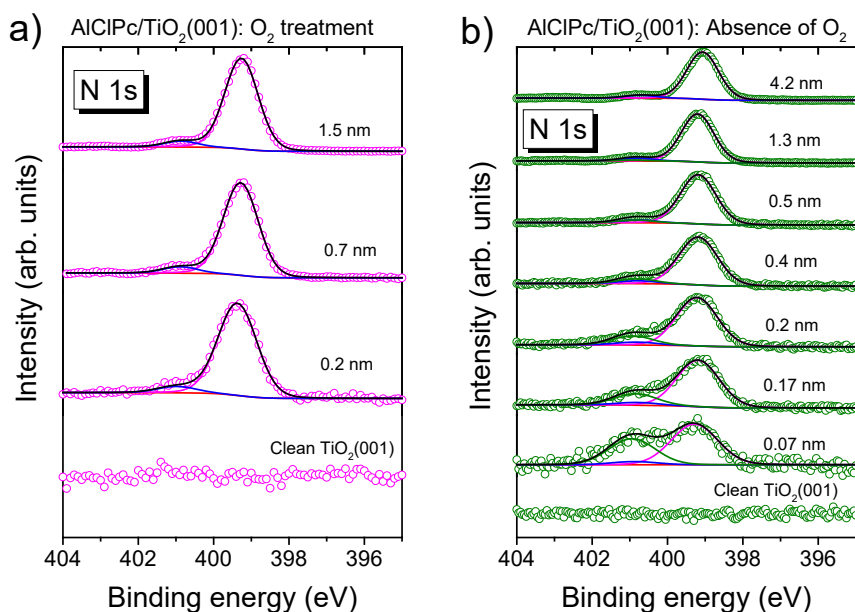

**Figure S5.** All N1s spectra fitted for (a) AlClPc/TiO<sub>2</sub>(001) treated with O<sub>2</sub>, (b) AlClPc/TiO<sub>2</sub>(001) prepared in absence of O<sub>2</sub>.

**Table S7.** N1s core level spectra fitting parameters of AlClPc films on TiO<sub>2</sub>(100) surface.

|               | AlClPc/TiO <sub>2</sub> (100): O <sub>2</sub> treatment |                    |       |                        |                    |       |                        |                    |       |
|---------------|---------------------------------------------------------|--------------------|-------|------------------------|--------------------|-------|------------------------|--------------------|-------|
|               | Layer thickness 0.1 nm                                  |                    |       | Layer thickness 0.4 nm |                    |       | Layer thickness 1.2 nm |                    |       |
| Peak name     | N-1                                                     | S <sub>(N-1)</sub> | N-3   | N-1                    | S <sub>(N-1)</sub> | N-3   | N-1                    | S <sub>(N-1)</sub> | N-3   |
| Position/eV   | 1.2                                                     | 1.2                | 1.2   | 1.1                    | 1.1                | 1.1   | 1.1                    | 1.1                | 1.1   |
| GP-FWHM/eV    | 399.3                                                   | 400.9              | 401.0 | 399.3                  | 400.9              | 401.0 | 399.3                  | 400.9              | 401.0 |
| LP-FWHM/eV    | 0.1                                                     | 0.1                | 0.1   | 0.1                    | 0.1                | 0.1   | 0.1                    | 0.1                | 0.1   |
| Relative Area | 0.87                                                    | 0.06               | 0.07  | 0.94                   | 0.06               | 0.00  | 0.94                   | 0.06               | 0.00  |

|               | AlClPc/TiO <sub>2</sub> (100): Absence of O <sub>2</sub> |                    |       |                        |                    |       |                        |                    |       |
|---------------|----------------------------------------------------------|--------------------|-------|------------------------|--------------------|-------|------------------------|--------------------|-------|
|               | Layer thickness 0.1 nm                                   |                    |       | Layer thickness 0.3 nm |                    |       | Layer thickness 1.3 nm |                    |       |
| Peak name     | N-1                                                      | S <sub>(N-1)</sub> | N-3   | N-1                    | S <sub>(N-1)</sub> | N-3   | N-1                    | S <sub>(N-1)</sub> | N-3   |
| Position/eV   | 1.3                                                      | 1.3                | 1.3   | 1.1                    | 1.1                | 1.1   | 1.0                    | 1.0                | 1.0   |
| GP-FWHM/eV    | 399.1                                                    | 400.7              | 400.8 | 399.1                  | 400.7              | 400.8 | 399.0                  | 400.6              | 400.7 |
| LP-FWHM/eV    | 0.1                                                      | 0.1                | 0.1   | 0.1                    | 0.1                | 0.1   | 0.1                    | 0.1                | 0.1   |
| Relative Area | 0.82                                                     | 0.06               | 0.12  | 0.90                   | 0.06               | 0.04  | 0.94                   | 0.06               | 0.00  |

**Table S8.** N1s core level spectra fitting parameters of AlClPc films on TiO<sub>2</sub>(001) surface.

| AlClPc/TiO <sub>2</sub> (001): O <sub>2</sub> treatment |                        |                    |       |                        |                    |       |                        |                    |       |
|---------------------------------------------------------|------------------------|--------------------|-------|------------------------|--------------------|-------|------------------------|--------------------|-------|
|                                                         | Layer thickness 0.2 nm |                    |       | Layer thickness 0.7 nm |                    |       | Layer thickness 1.5 nm |                    |       |
| Peak name                                               | N-1                    | S <sub>(N-1)</sub> | N-3   | N-1                    | S <sub>(N-1)</sub> | N-3   | N-1                    | S <sub>(N-1)</sub> | N-3   |
| Position/eV                                             | 1.2                    | 1.2                | 1.2   | 1.0                    | 1.0                | 1.0   | 1.0                    | 1.0                | 1.0   |
| GP-FWHM/eV                                              | 399.4                  | 401.0              | 401.1 | 399.3                  | 400.9              | 401.0 | 399.3                  | 400.9              | 401.0 |
| LP-FWHM/eV                                              | 0.1                    | 0.1                | 0.1   | 0.1                    | 0.1                | 0.1   | 0.1                    | 0.1                | 0.1   |
| Relative Area                                           | 0.94                   | 0.06               | 0.00  | 0.94                   | 0.06               | 0.00  | 0.94                   | 0.06               | 0.00  |

| AlClPc/TiO <sub>2</sub> (001): Absence of O <sub>2</sub> |                        |                    |       |                        |                    |       |                        |                    |       |
|----------------------------------------------------------|------------------------|--------------------|-------|------------------------|--------------------|-------|------------------------|--------------------|-------|
|                                                          | Layer thickness 0.2 nm |                    |       | Layer thickness 0.5 nm |                    |       | Layer thickness 1.3 nm |                    |       |
| Peak name                                                | N-1                    | S <sub>(N-1)</sub> | N-3   | N-1                    | S <sub>(N-1)</sub> | N-3   | N-1                    | S <sub>(N-1)</sub> | N-3   |
| Position/eV                                              | 1.3                    | 1.3                | 1.3   | 1.1                    | 1.1                | 1.1   | 1.0                    | 1.0                | 1.0   |
| GP-FWHM/eV                                               | 399.2                  | 400.8              | 400.9 | 399.2                  | 400.8              | 400.9 | 399.2                  | 400.8              | 400.9 |
| LP-FWHM/eV                                               | 0.1                    | 0.1                | 0.1   | 0.1                    | 0.1                | 0.1   | 0.1                    | 0.1                | 0.1   |
| Relative Area                                            | 0.77                   | 0.05               | 0.19  | 0.90                   | 0.05               | 0.05  | 0.93                   | 0.06               | 0.02  |

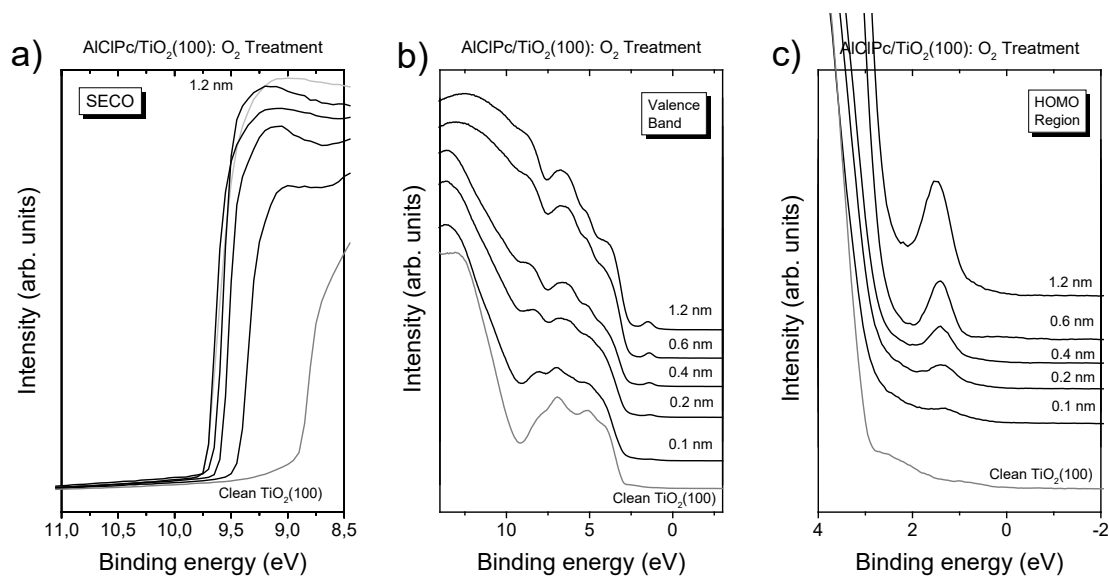

**Figure S6.** Thickness dependent UPS results measured for AlClPc films on TiO<sub>2</sub>(100) treated with oxygen: (a) secondary electron cut-off, (b) valence band spectra, (c) valence band spectra – HOMO region.



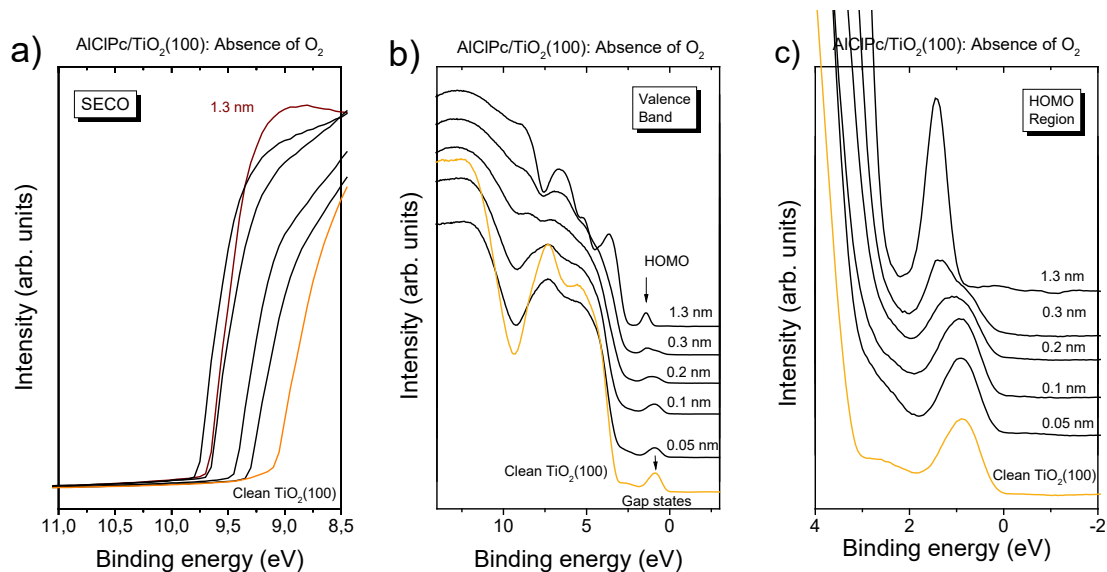

**Figure S7.** Thickness dependent UPS results measured for AlClPc films on  $\text{TiO}_2(100)$  prepared in absence of oxygen: (a) secondary electron cut-off, (b) valence band spectra, (c) valence band spectra – HOMO region.

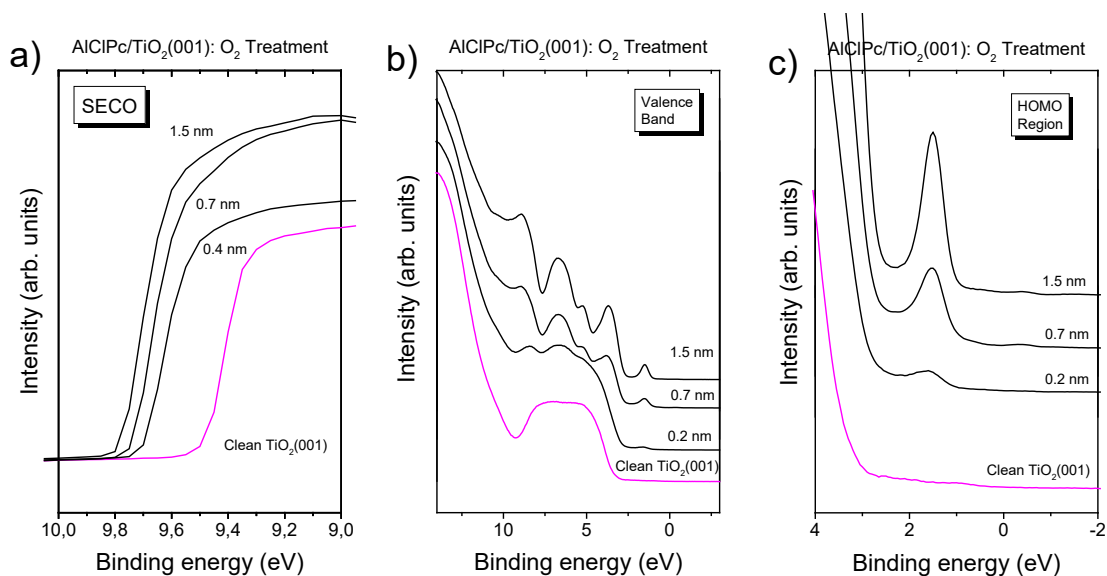

**Figure S8.** Thickness dependent UPS results measured for AlClPc films on  $\text{TiO}_2(001)$  treated with oxygen: (a) secondary electron cut-off, (b) valence band spectra, (c) valence band spectra – HOMO region.

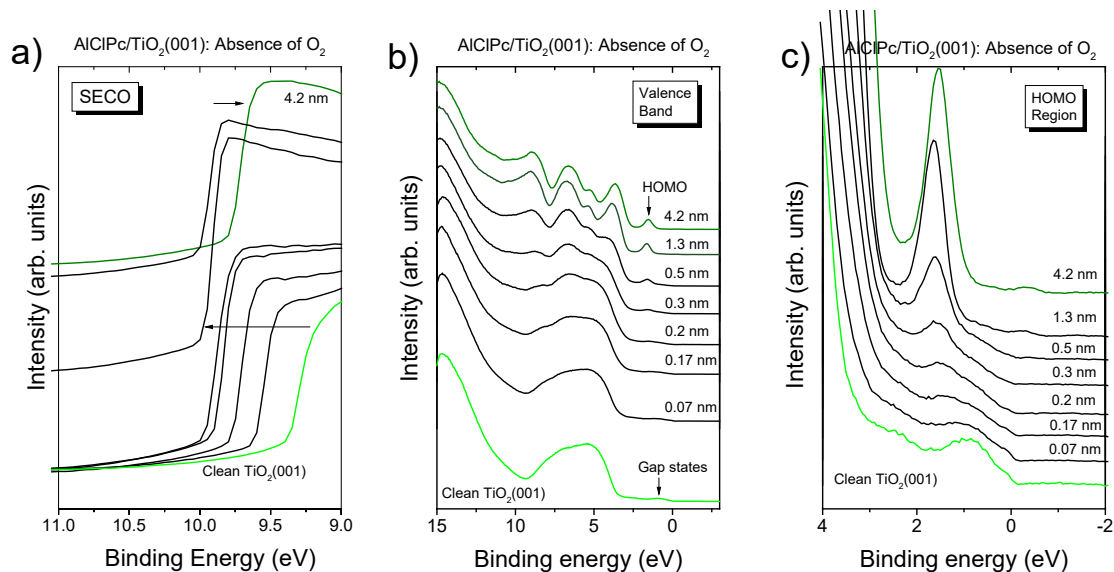

**Figure S9.** Thickness dependent UPS results measured for AlClPc films on TiO<sub>2</sub>(001) prepared in absence of oxygen: (a) secondary electron cut-off, (b) valence band spectra, (c) valence band spectra – HOMO region.

An example of valence band spectra with a magnification of HOMO onset is shown in **Figures S9b** and **S9c**. The bottom spectrum of **Figure S9b** and **S9c** is the spectrum of a clean rutile TiO<sub>2</sub>(001) with 12% defects. The presence of defects is seen as the increase in intensity (defect/gap states) at 0.8 eV. The band gap of the rutile is expected to be 3 eV, but due to preparation conditions the valence band edge is shifted to 3.4 eV. After evaporation of first layer of AlClPc a small HOMO peak with onset at 0.9 eV arises. As the film thickness increases the HOMO peak shifts to higher binding energies. At 0.5 nm the onset reaches 1.1 eV. For bulk film of 4.2 nm, the HOMO onset moves back to the lower binding energy (1.0 eV). The values of work function, HOMO onset and ionization potential are summarized in **Tables S9** and **S10**.

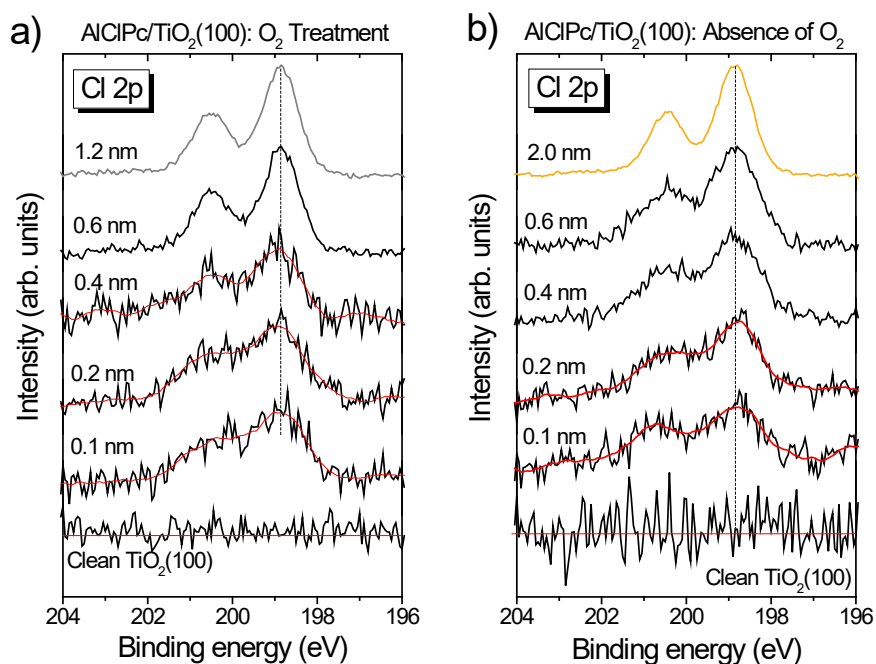

**Figure S10.** Thickness dependent Cl 2p spectra of AlClPc evaporated on (a)  $\text{TiO}_2(100)$  treated with  $\text{O}_2$ , (b)  $\text{TiO}_2(100)$  prepared in absence of  $\text{O}_2$ . The red lines represent the original data after smoothing procedure for the ease of data comparison.

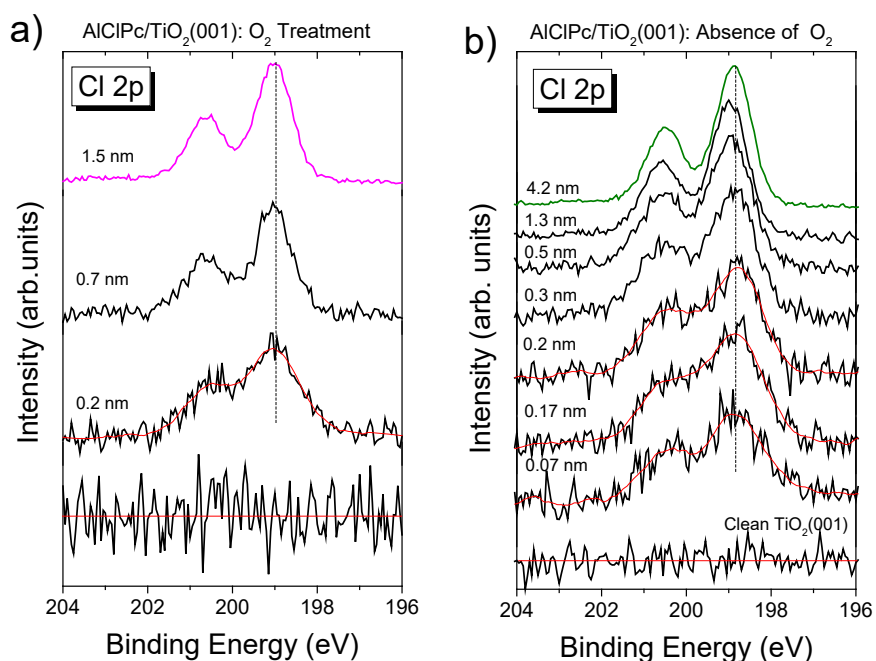

**Figure S11.** Thickness dependent Cl 2p spectra of AlClPc evaporated on (a)  $\text{TiO}_2(001)$  treated with  $\text{O}_2$ , (b)  $\text{TiO}_2(001)$  prepared in absence of  $\text{O}_2$ . The red lines represent the original data after smoothing procedure for the ease of data comparison.

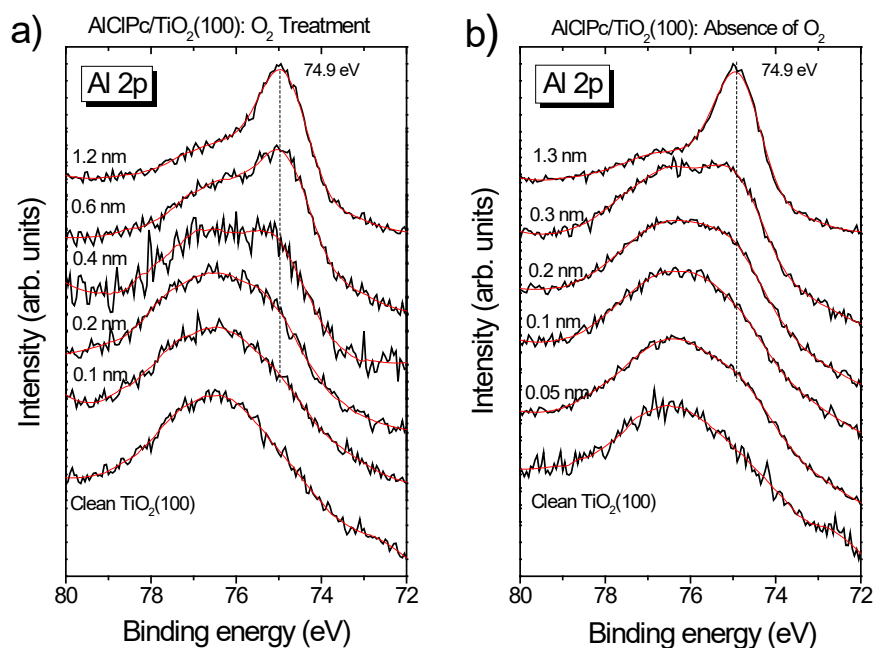

**Figure S12.** Al 2p spectra for: (a) AIClPc on  $\text{TiO}_2(100)$  treated with  $\text{O}_2$ , (b) AIClPc on  $\text{TiO}_2(100)$  prepared in absence of  $\text{O}_2$ . The red lines represent the original data after smoothing procedure for the ease of data comparison.

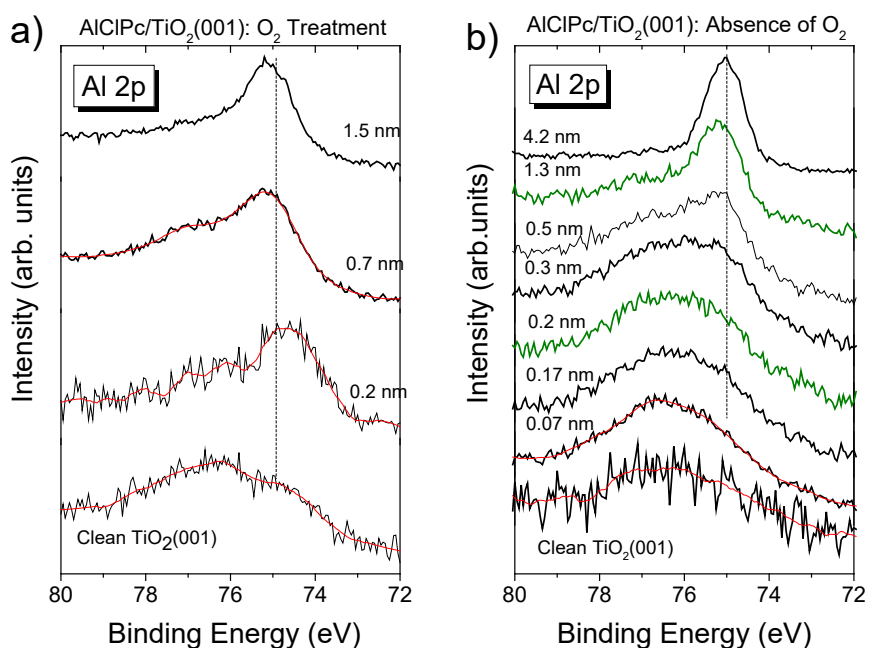

**Figure S13.** Al 2p spectra for: (a) AIClPc on  $\text{TiO}_2(001)$  treated with  $\text{O}_2$ , (b) AIClPc on  $\text{TiO}_2(001)$  prepared in absence of  $\text{O}_2$ . The red lines represent the original data after smoothing procedure for the ease of data comparison.

**Table S9.** UPS parameters: work function, HOMO onset, ionization potential for the following systems: AlClPc/TiO<sub>2</sub>(100) treated with oxygen, AlClPc/TiO<sub>2</sub>(100) prepared in absence of oxygen.

| AlClPc/<br>TiO <sub>2</sub> (001) | Work<br>function (eV) | Homo<br>Onset (eV) | Ionization<br>Potential<br>(eV) |
|-----------------------------------|-----------------------|--------------------|---------------------------------|
| TiO <sub>2</sub>                  | 5.3                   | x                  | 8.3                             |
| 0.1 nm                            | 4.8                   | 0.8                | 5.6                             |
| 0.2 nm                            | 4.6                   | 0.9                | 5.5                             |
| 0.4 nm                            | 4.5                   | 0.9                | 5.4                             |
| 0.6 nm                            | 4.5                   | 0.9                | 5.4                             |
| 1.2 nm                            | 4.5                   | 0.9                | 5.4                             |

| AlClPc/<br>TiO <sub>2</sub> (001) | Work<br>function (eV) | Homo<br>Onset (eV) | Ionization<br>Potential<br>(eV) |
|-----------------------------------|-----------------------|--------------------|---------------------------------|
| TiO <sub>2</sub>                  | 5.1                   | x                  | 8.3                             |
| 0.05 nm                           | 4.9                   | 0.9                | 5.8                             |
| 0.1 nm                            | 4.8                   | 0.9                | 5.7                             |
| 0.2 nm                            | 4.6                   | 0.9                | 5.5                             |
| 0.3 nm                            | 4.4                   | 0.9                | 5.3                             |
| 1.3 nm                            | 4.5                   | 0.9                | 5.4                             |

**Table S10.** UPS parameters: work function, HOMO onset, ionization potential for the following systems: AlClPc/TiO<sub>2</sub>(001) treated with oxygen and AlClPc/TiO<sub>2</sub>(001) prepared in absence of oxygen.

| AlClPc/<br>TiO <sub>2</sub> (001) | Work<br>function (eV) | Homo<br>Onset (eV) | Ionization<br>Potential<br>(eV) |
|-----------------------------------|-----------------------|--------------------|---------------------------------|
| TiO <sub>2</sub>                  | 4.7                   | x                  | 8.1                             |
| 0.2 nm                            | 4.5                   | 1.0                | 5.5                             |
| 0.7 nm                            | 4.5                   | 1.0                | 5.5                             |
| 1.5 nm                            | 4.4                   | 1.0                | 5.4                             |

| AlClPc/<br>TiO <sub>2</sub> (001) | Work<br>function (eV) | Homo<br>Onset (eV) | Ionization<br>Potential<br>(eV) |
|-----------------------------------|-----------------------|--------------------|---------------------------------|
| TiO <sub>2</sub>                  | 4.7                   | x                  | 8.1                             |

|         |     |     |     |
|---------|-----|-----|-----|
| 0.07 nm | 4.6 | 0.9 | 5.5 |
| 0.17 nm | 4.4 | 1.0 | 5.4 |
| 0.2 nm  | 4.3 | 1.0 | 5.3 |
| 0.3 nm  | 4.2 | 1.0 | 5.2 |
| 0.5 nm  | 4.2 | 1.1 | 5.3 |
| 1.3 nm  | 4.2 | 1.1 | 5.3 |
| 4.2 nm  | 4.4 | 1.0 | 5.4 |

**Table S11.** Stoichiometric relations C:N:Cl for AlClPc on (100) and (001) surfaces at different reduction degree.

| Film stoichiometry AlClPc/TiO <sub>2</sub> (100) 0% defects  |                 |         |        |        |        |        |
|--------------------------------------------------------------|-----------------|---------|--------|--------|--------|--------|
| Thickness                                                    | AlClPc molecule | 0.1 nm  | 0.2 nm | 0.4 nm | 0.6 nm | 1.2 nm |
| C                                                            | 32.0            | 32.1    | 32.0   | 32.0   | 32     | 32     |
| N                                                            | 8.0             | 7.7     | 7.9    | 8.1    | 7.7    | 7.8    |
| Cl                                                           | 1.0             | 1.4     | 1.5    | 1.2    | 1.2    | 1.0    |
| Film stoichiometry AlClPc/TiO <sub>2</sub> (100) 16% defects |                 |         |        |        |        |        |
| Thickness                                                    | AlClPc molecule | 0.05 nm | 0.1 nm | 0.2 nm | 0.3 nm | 1.3 nm |
| C                                                            | 32.0            | 32      | 32     | 32     | 32     | 32     |
| N                                                            | 8.0             | 7.7     | 7.2    | 7.5    | 7.5    | 7.5    |
| Cl                                                           | 1.0             | 1.4     | 1.0    | 1.3    | 0.9    | 0.7    |

| Film stoichiometry AlClPc/TiO <sub>2</sub> (001) 0% defects  |                 |         |         |        |        |        |        |        |
|--------------------------------------------------------------|-----------------|---------|---------|--------|--------|--------|--------|--------|
| Thickness                                                    | AlClPc molecule | 0.2 nm  | 0.7 nm  | 1.5 nm |        |        |        |        |
| C                                                            | 32.0            | 32.0    | 32.0    | 32.0   |        |        |        |        |
| N                                                            | 8.0             | 8.1     | 7.6     | 8.4    |        |        |        |        |
| Cl                                                           | 1.0             | 1.0     | 1.6     | 1.5    |        |        |        |        |
| Film stoichiometry AlClPc/TiO <sub>2</sub> (001) 12% defects |                 |         |         |        |        |        |        |        |
| Thickness                                                    | AlClPc molecule | 0.07 nm | 0.17 nm | 0.2 nm | 0.3 nm | 0.5 nm | 1.3 nm | 4.2 nm |
| C                                                            | 32.0            | 32.0    | 32.0    | 32.0   | 32.0   | 32.0   | 32.0   | 32.0   |
| N                                                            | 8.0             | 8.0     | 7.1     | 7.9    | 7.2    | 7.2    | 7.8    | 8.1    |
| Cl                                                           | 1.0             | 1.9     | 1.2     | 2.0    | 1.4    | 1.3    | 1.4    | 1.5    |

The stoichiometric relations presented in Table S11 are compared to stoichiometric relations between atoms in AlClPc molecule presented in Figure 1, where the ratio between C:N:Cl atoms is 32:8:1.

1. Jackman, M. J.; Thomas, A. G.; Muryn, C., Photoelectron Spectroscopy Study of Stoichiometric and Reduced Anatase TiO<sub>2</sub>(101) Surfaces: The Effect of Subsurface Defects on Water Adsorption at Near-Ambient Pressures. *The Journal of Physical Chemistry C* **2015**, *119* (24), 13682-13690.
